# Supplementary material for: Development of a novel complex inflammatory bowel disease mouse model: Reproducing human inflammatory bowel disease etiologies in mice
Source: PubMed Central journal article supplement (PMC11581264; doi:10.1371/journal.pone.0311310), 2024-11-21
Supplement: pone.0311310.s001.pdf [file pone.0311310.s001.pdf]

S1\_raw-images

**Development of a novel complex inflammatory bowel disease mouse model: reproducing human inflammatory bowel disease etiologies in mice**

Sun-Min Seo<sup>1</sup>, Na-Won Kim<sup>1</sup>, Eun-Seon Yoo<sup>1</sup>, Ji-Hun Lee<sup>1</sup>, Ah-Reum Kang<sup>1</sup>, Han-Bi Jeong<sup>1</sup>, Won-Yong Shim<sup>1</sup>, Dong-Hyun Kim<sup>1</sup>, Young-Jun Park<sup>1</sup>, Kieun Bae<sup>2</sup>, Kyong-Ah Yoon<sup>2</sup>, Yang-Kyu Choi<sup>1\*</sup>

<sup>1</sup> Department of Laboratory Animal Medicine, College of Veterinary Medicine, Konkuk University, Seoul, Republic of Korea

<sup>2</sup> Department of Veterinary Biochemistry, College of Veterinary Medicine, Konkuk University, Seoul, Republic of Korea

\*Corresponding author: [yangkyc@konkuk.ac.kr](mailto:yangkyc@konkuk.ac.kr) (YKC)

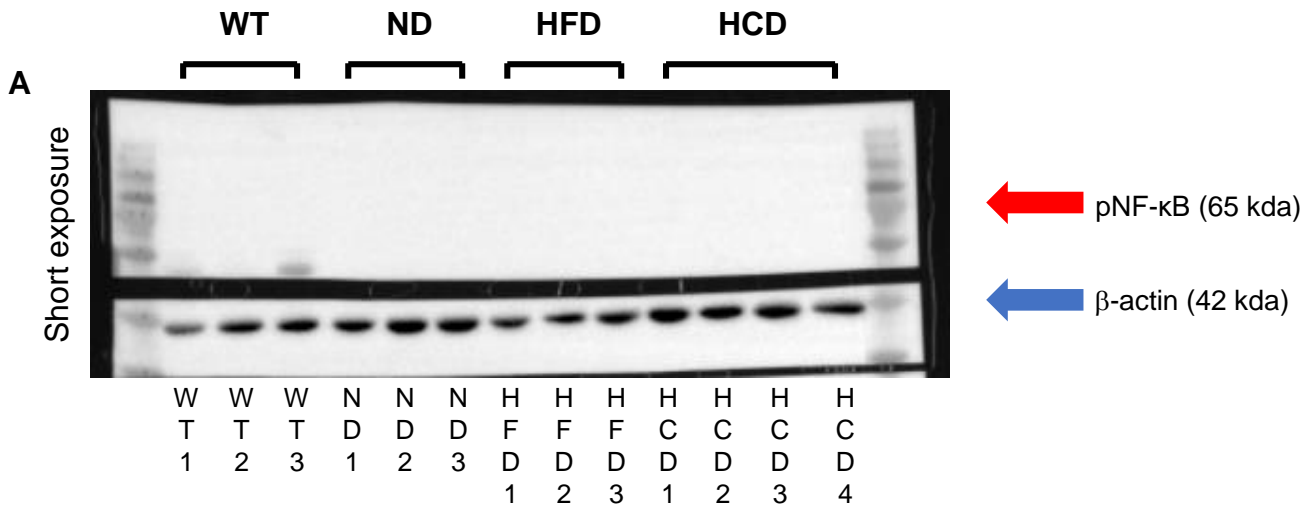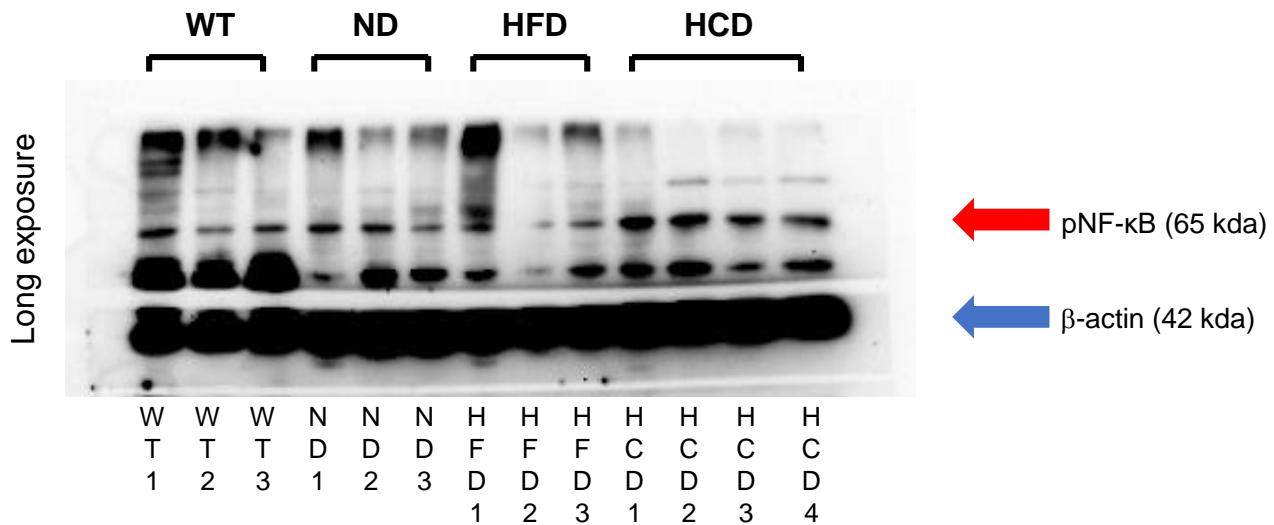

Uncropped images of blot presented in Fig 6A

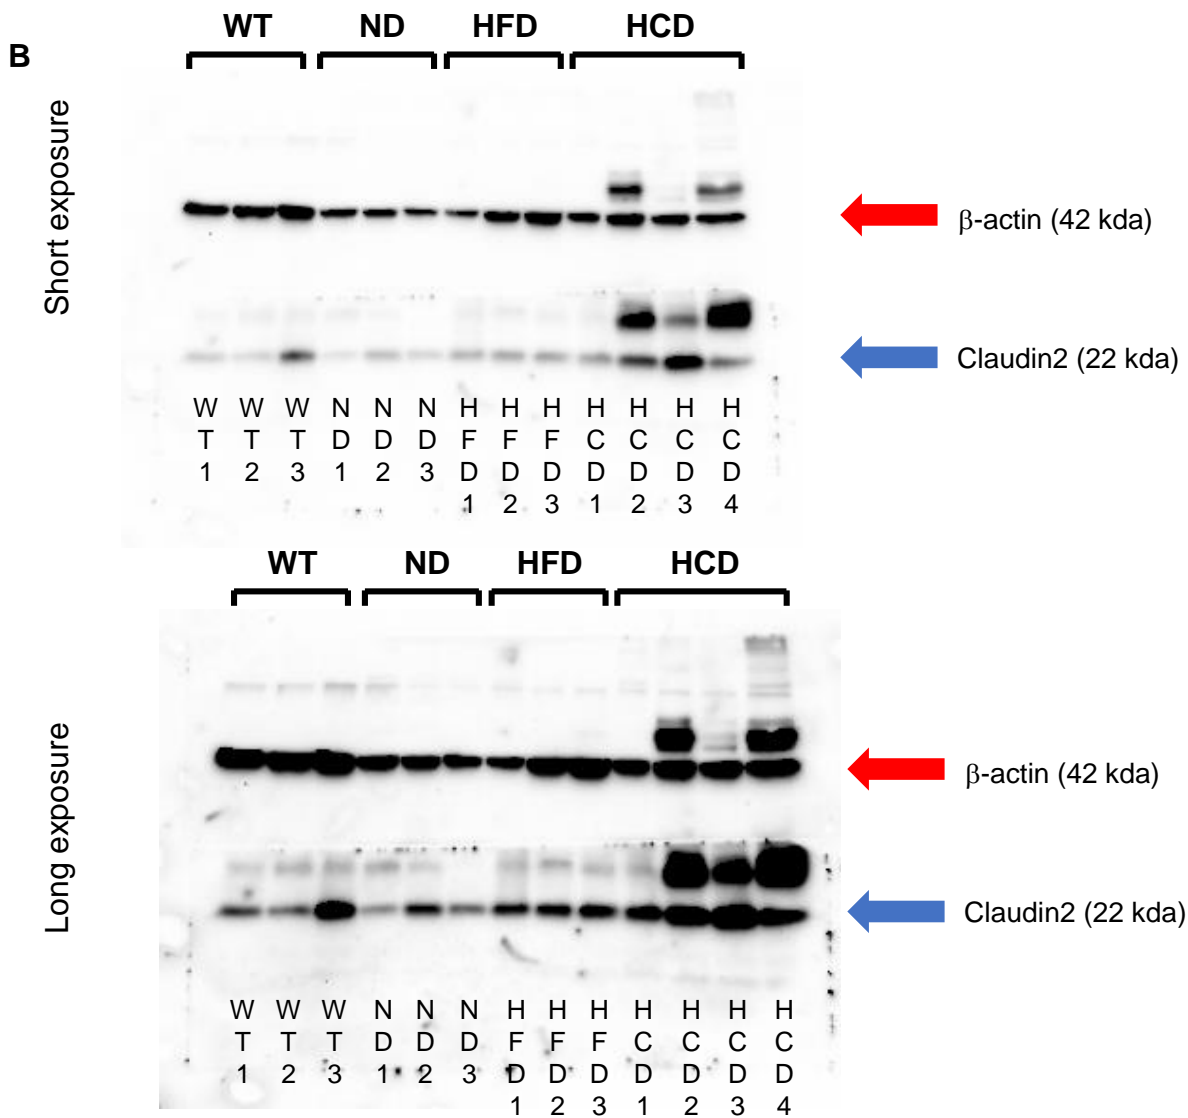

Uncropped images of blot presented in Fig 6B
